# Supplementary material
Source: PubMed Central journal article supplement (PMC3927369)
Supplement: NIHMS546599-supplement-1_si_001.pdf [file NIHMS546599-supplement-1_si_001.pdf]

SUPPLEMENTAL FIGURES

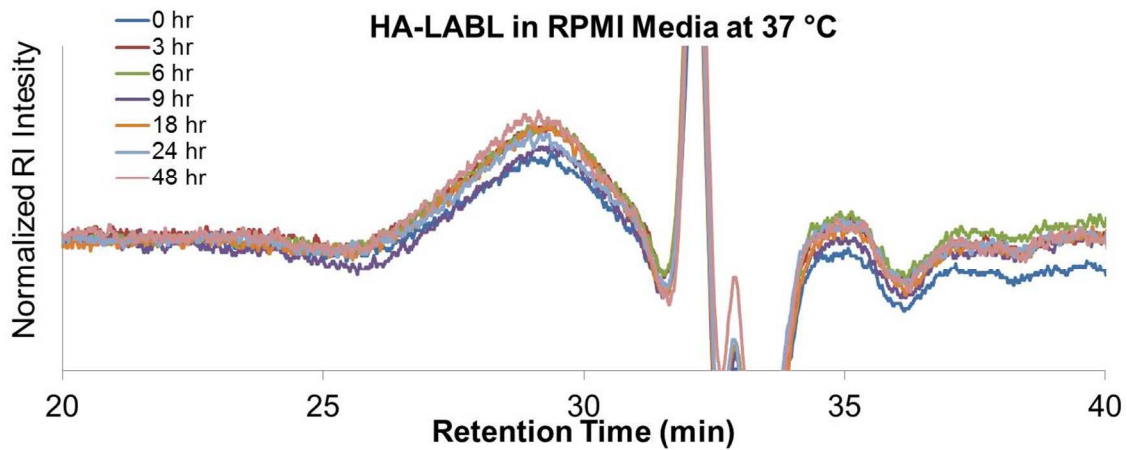

**Supplemental Figure 1:** GPC chromatogram showing overlaid time point readings for HA-LABL graft conjugate in RPMI media incubated at 37 °C. Over the 48 hour experimental time period no changes were seen in the sample chromatogram. (Note: the peak at 32 minutes in the chromatogram is a salt peak from the mobile phase).
